# Supplementary material for: Photo-responsive metal–organic gels of rigid phenylene-1,3-di-substituted angular dienes with metal halides: gel-to-gel transformations triggered by [2 + 2] polymerization
Source: Royal Society of Chemistry journal article supplement (doi:10.1039/d4dt00010b), 2024-01-01
Supplement: d4dt00010b1.pdf [file d4dt00010b1.pdf]

Supporting Information

**Photo Responsive Metal-Organic Gels of Rigid Phenylene-1,3-di-Substituted Angular Diene with Metal Halides: Gel-to-Gel Transformation triggered by [2+2] Polymerization**

Shaheen Sultana, Rajorshi Mandal and Kumar Biradha\*

\* Department of Chemistry, Indian Institute of Technology, Kharagpur-721302, India

E-mail: [kbiradha@chem.iitkgp.ernet.in](mailto:kbiradha@chem.iitkgp.ernet.in)

**Contents**

|                                                               |              |
|---------------------------------------------------------------|--------------|
| Gelation Studies.....                                         | Table S1     |
| <sup>1</sup> HNMR study.....                                  | Fig. S1-S5   |
| X-ray powder diffraction pattern.....                         | Fig. S6      |
| FT-IR spectra.....                                            | Fig. S7-S8   |
| Rheological analysis.....                                     | Fig. S9-S13  |
| FESEM & TEM image.....                                        | Fig. S14-S15 |
| Inverted vial photographs of gel-to-gel transition.....       | Fig. S16     |
| EDX-elemental analysis.....                                   | Fig. S17     |
| MALDI-TOF mass spectra.....                                   | Fig. S18     |
| Degree of polymerization.....                                 | Table S2     |
| Changes in rheological moduli before & after irradiation..... | Table S3     |
| UV-Vis absorption spectra of MOGs.....                        | Fig. S19     |
| References                                                    |              |

**Table S1** Gelation in different solvents for **MOG1-5**.

| Gels | (M:L)                   | Solvent<br>(Total vol =2ml) |
|------|-------------------------|-----------------------------|
| MOG1 | CdCl <sub>2</sub> (1:1) | MeOH                        |
| MOG2 | CdBr <sub>2</sub> (1:1) | MeOH                        |
| MOG3 | HgCl <sub>2</sub> (4:1) | MeOH:H <sub>2</sub> O (1:1) |
| MOG4 | HgBr <sub>2</sub> (4:1) | MeOH:H <sub>2</sub> O (1:1) |
| MOG5 | HgI <sub>2</sub> (4:1)  | MeOH:H <sub>2</sub> O (1:1) |

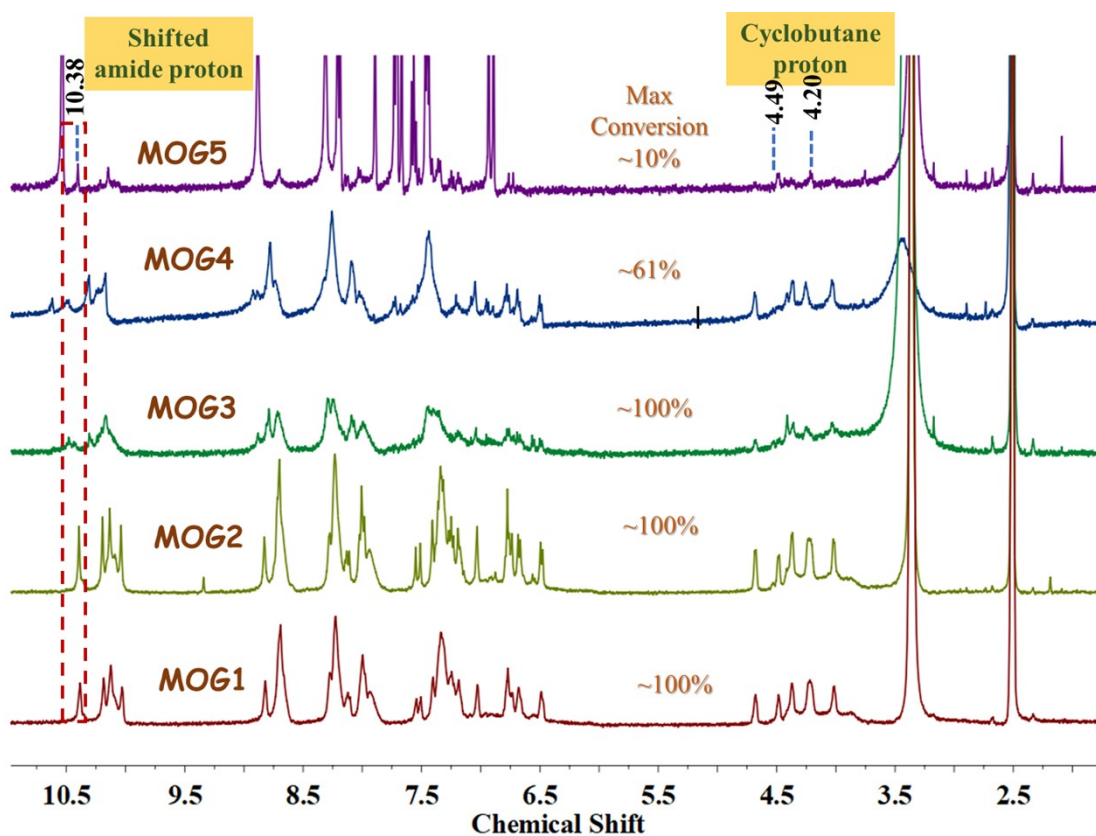

**Fig. S1** <sup>1</sup>H NMR spectra in DMSO-*d*<sub>6</sub> and % conversion of **MOG1-5** after 24h of UVA irradiation.

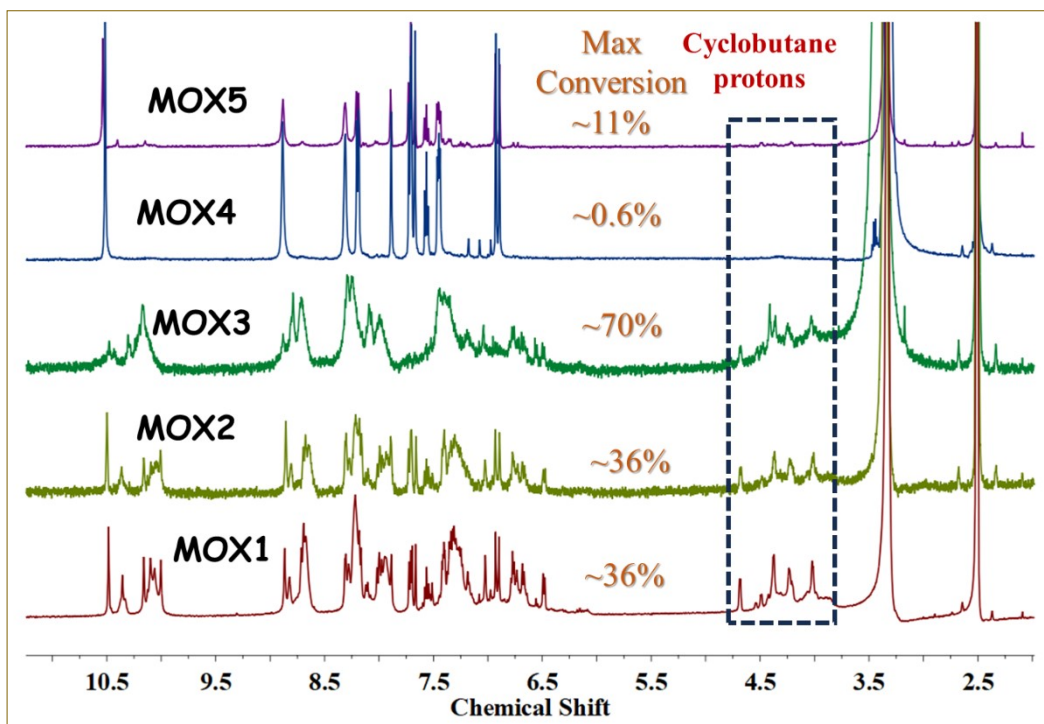

**Fig S2**  $^1\text{H}$ NMR spectra in  $\text{DMSO-}d_6$  of xerogels of **MOG1-5** at 24h of irradiation. Yield of the reaction has been calculated by taking into account the integration ratios of unreacted olefinic protons appearing at 6.89 ppm with newly formed cyclobutane peak at 4.21 ppm. <sup>1</sup>

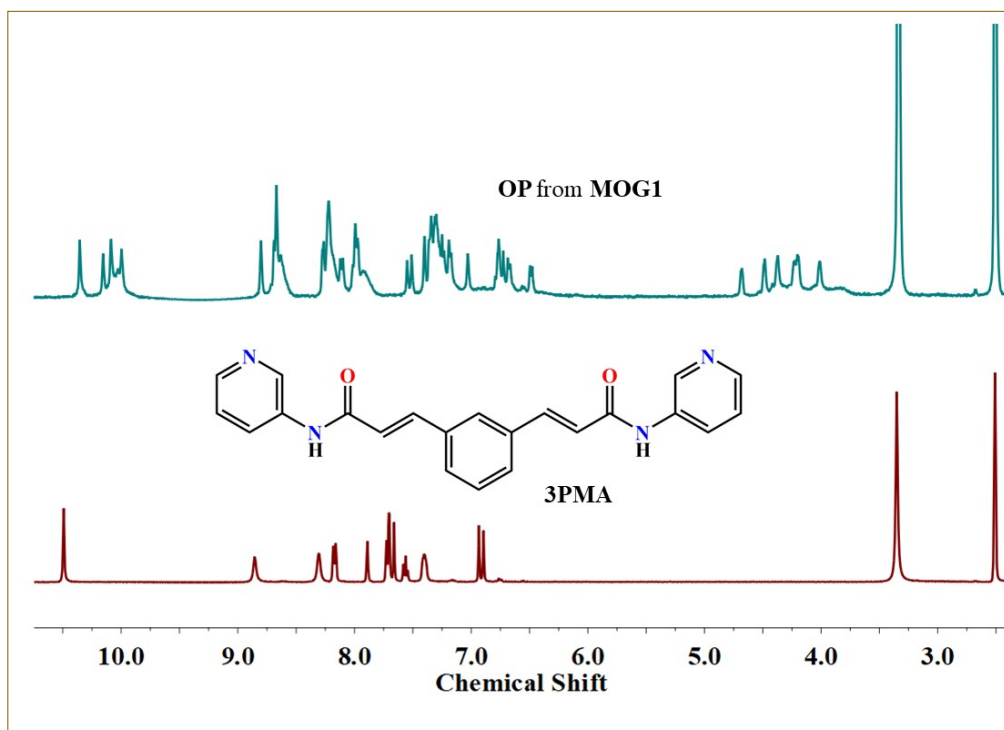

**Fig. S3**  $^1\text{H}$ NMR spectra of **3PMA** and the separated organic polymer in  $\text{DMSO-}d_6$ .

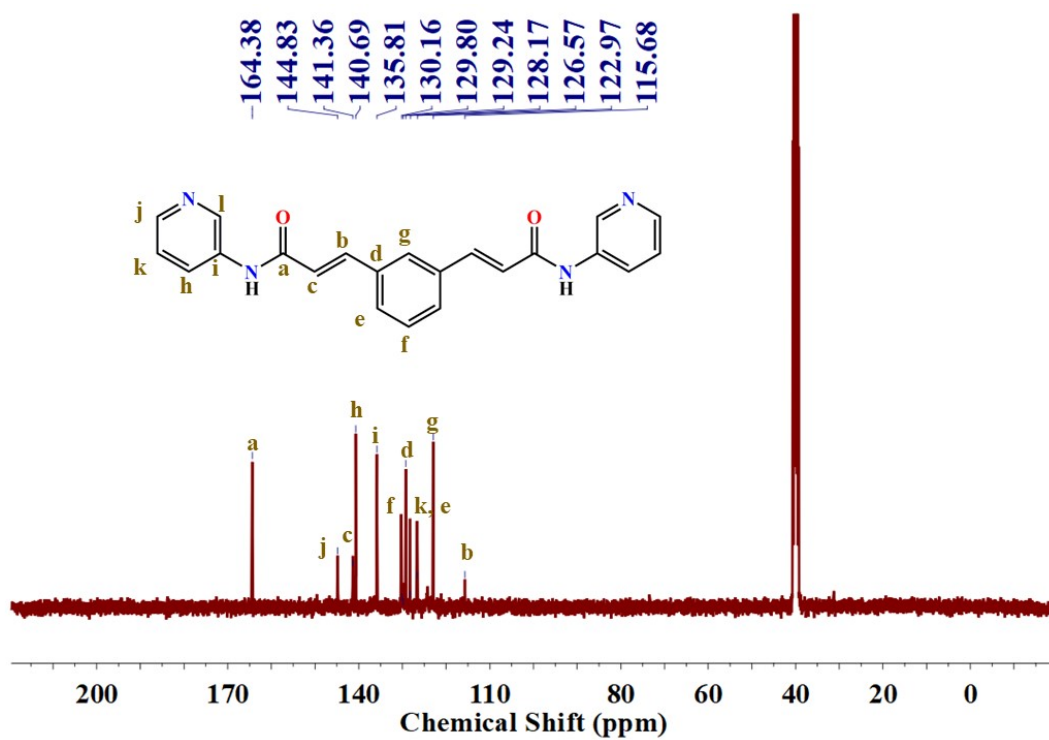

Fig. S4  $^{13}\text{C}$ NMR spectra of 3PMA in  $\text{DMSO-}d_6$ .

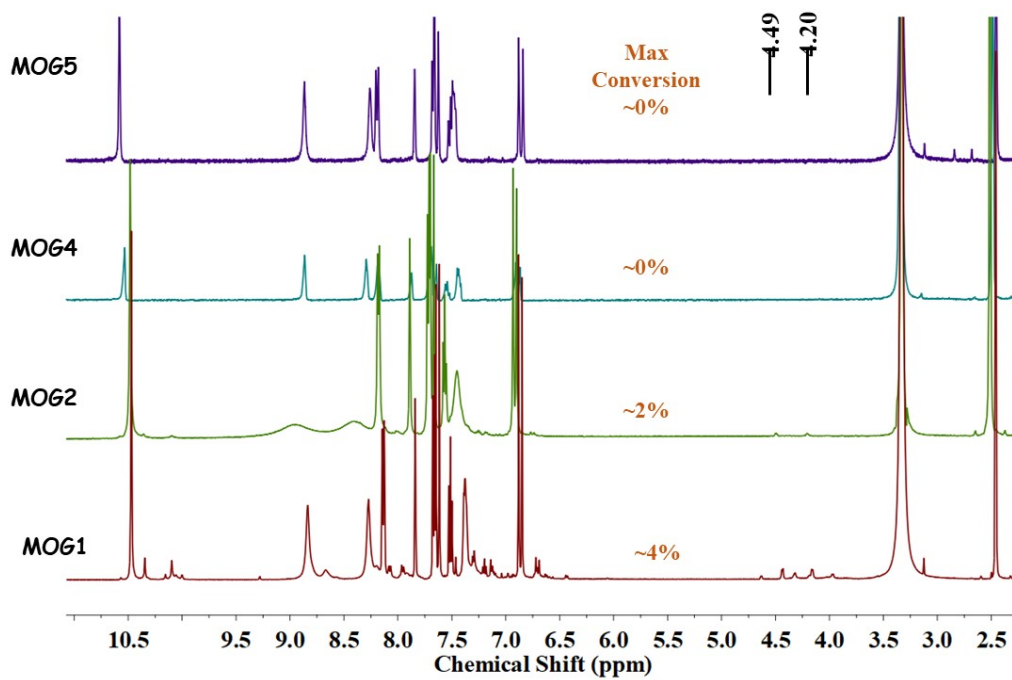

Fig. S5  $^1\text{H}$ NMR spectra illustrating % conversion of MOG1-2 and MOG4-5 upto the point of self-persistent nature in  $\text{DMSO-}d_6$ .

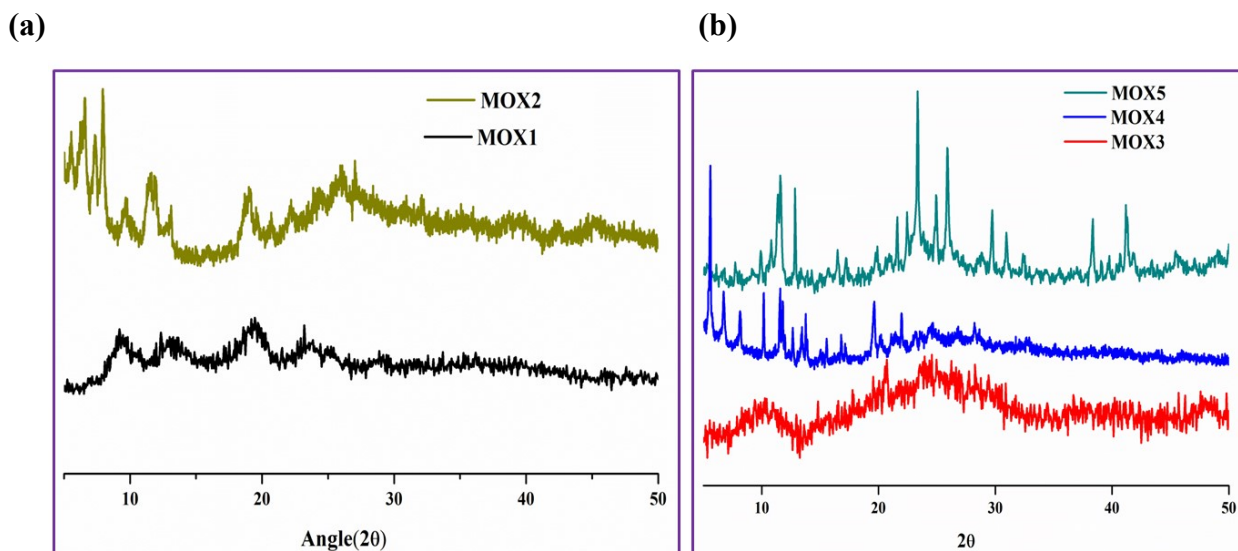

Fig. S6 XRPD pattern for all the xerogels of: (a) Cd(II) MOGs (b) Hg(II) MOGs.

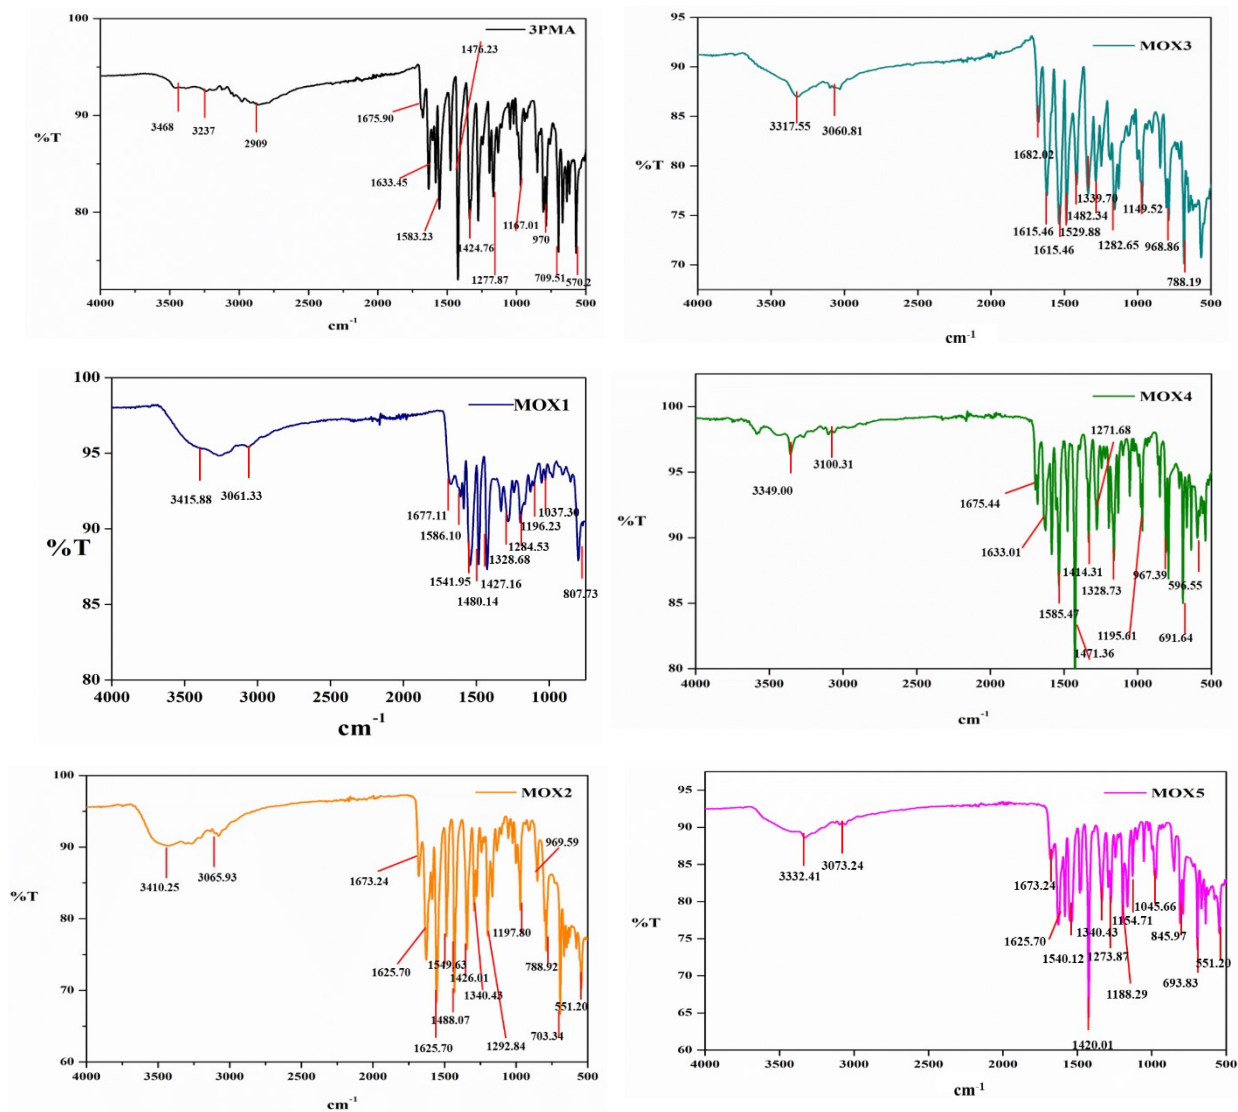

Fig. S7 FT-IR spectra of 3PMA and xerogel of MOG1-5.



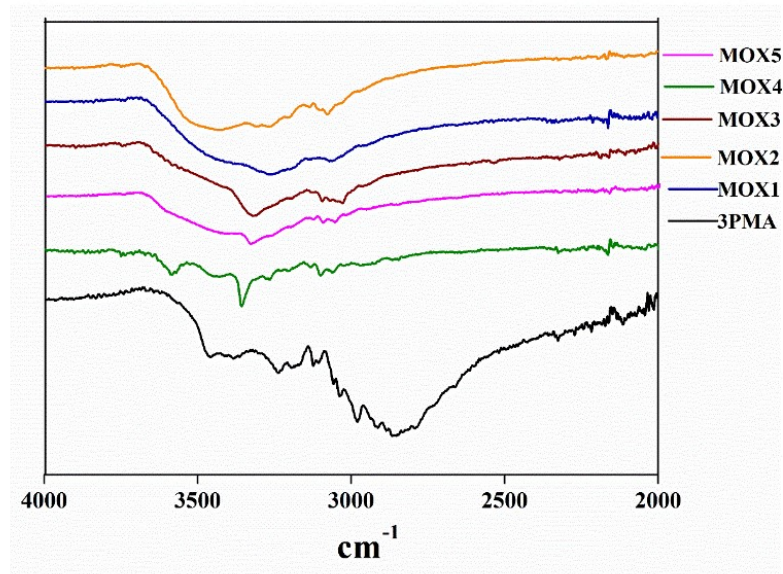

**Fig. S8** FT-IR spectra of 3PMA xerogel of MOG1-5 in 4000-2000  $\text{cm}^{-1}$  region. Notice the effect of intramolecular H bonding on secondary amine band.

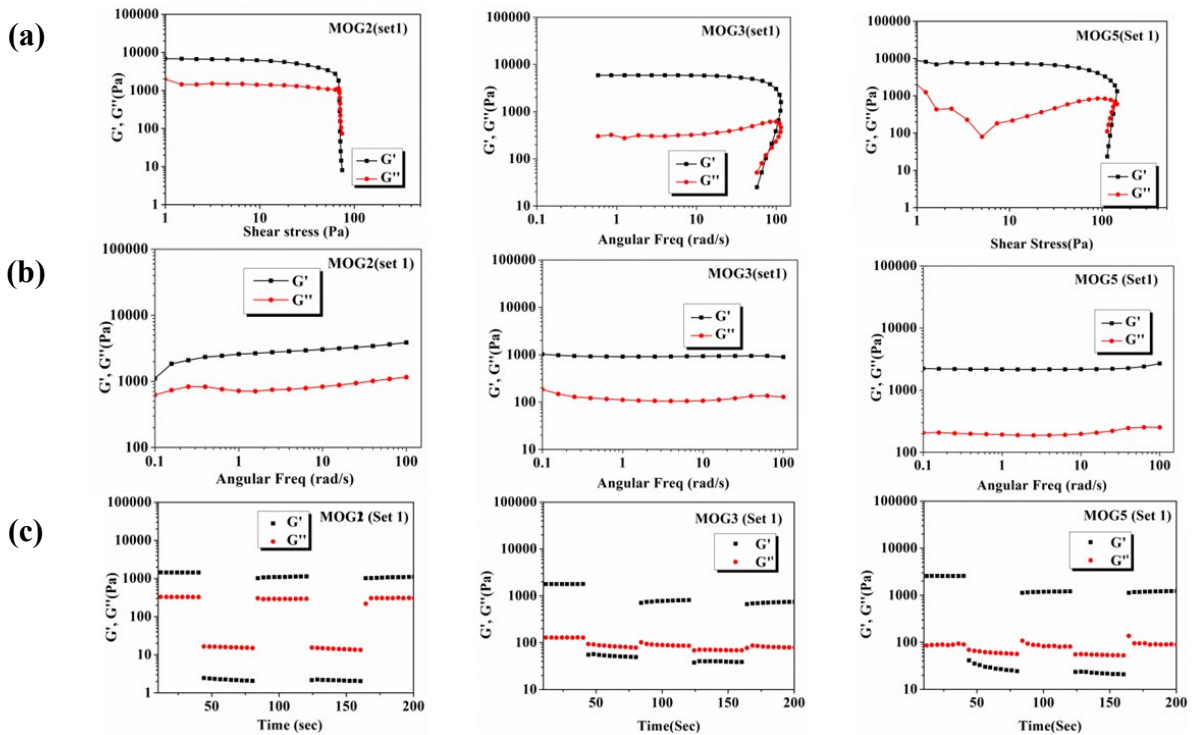

**Fig. S9** Rheological analysis for MOG2, MOG3 and MOG5 before irradiation: variation of storage modulus ( $G'$ ) and loss modulus ( $G''$ ) with: (a) shear stress (b) frequency and (c) step-strain hysteresis loop.

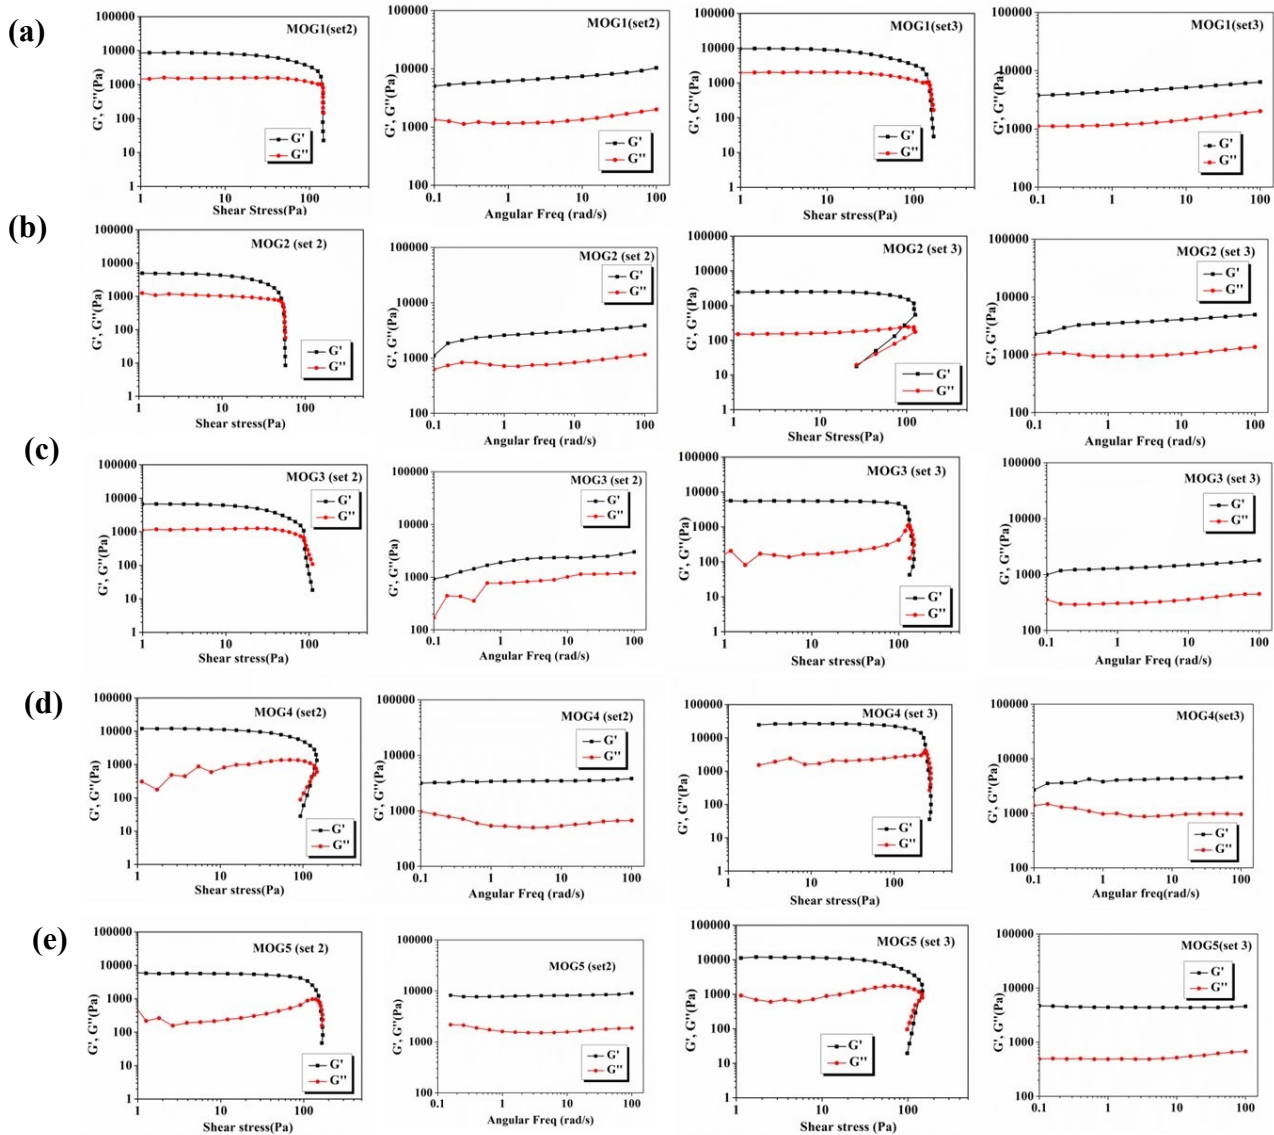

**Fig. S10** Rheological data reproducibility for **MOG1-5** before irradiation: variation of storage modulus ( $G'$ ) and loss modulus ( $G''$ ) with: shear stress and frequency for (a) **MOG1**, (b) **MOG2**, (c) **MOG3**, (d) **MOG4** and (e) **MOG5** (set 2 and set 3 denotes data for two different batches of sample).

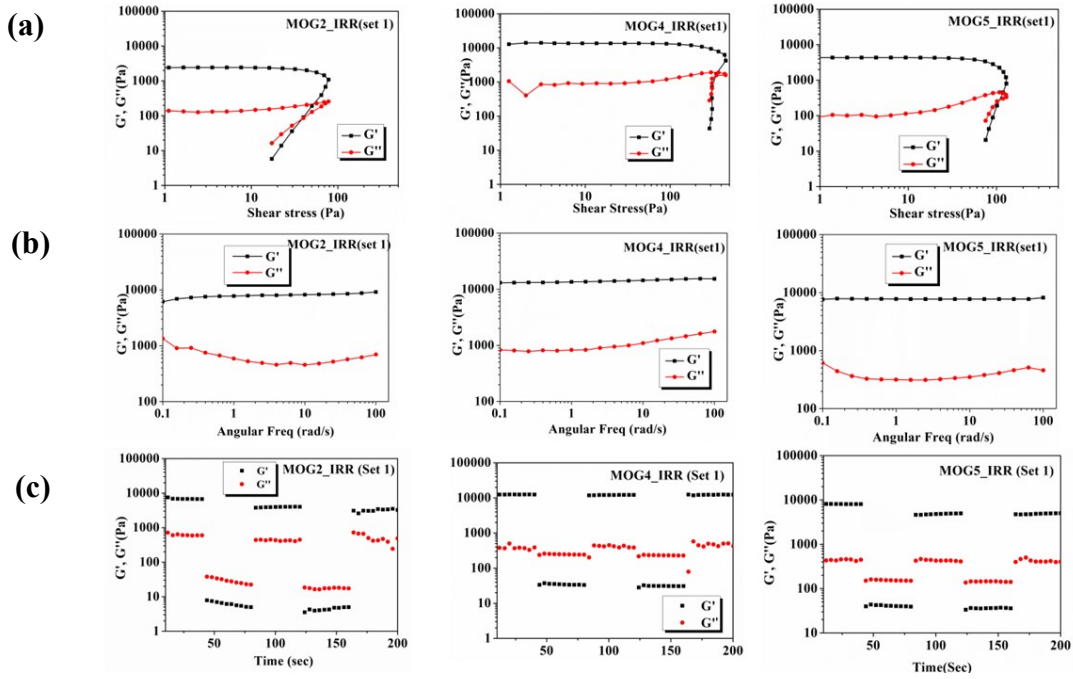

**Fig. S11** Rheological analysis for **MOG2, MOG4, & MOG5** after 24 hrs of UVA irradiation: variation of storage modulus ( $G'$ ) and loss modulus ( $G''$ ) with: (a) shear stress (b) frequency and (c) step-strain hysteresis loop.

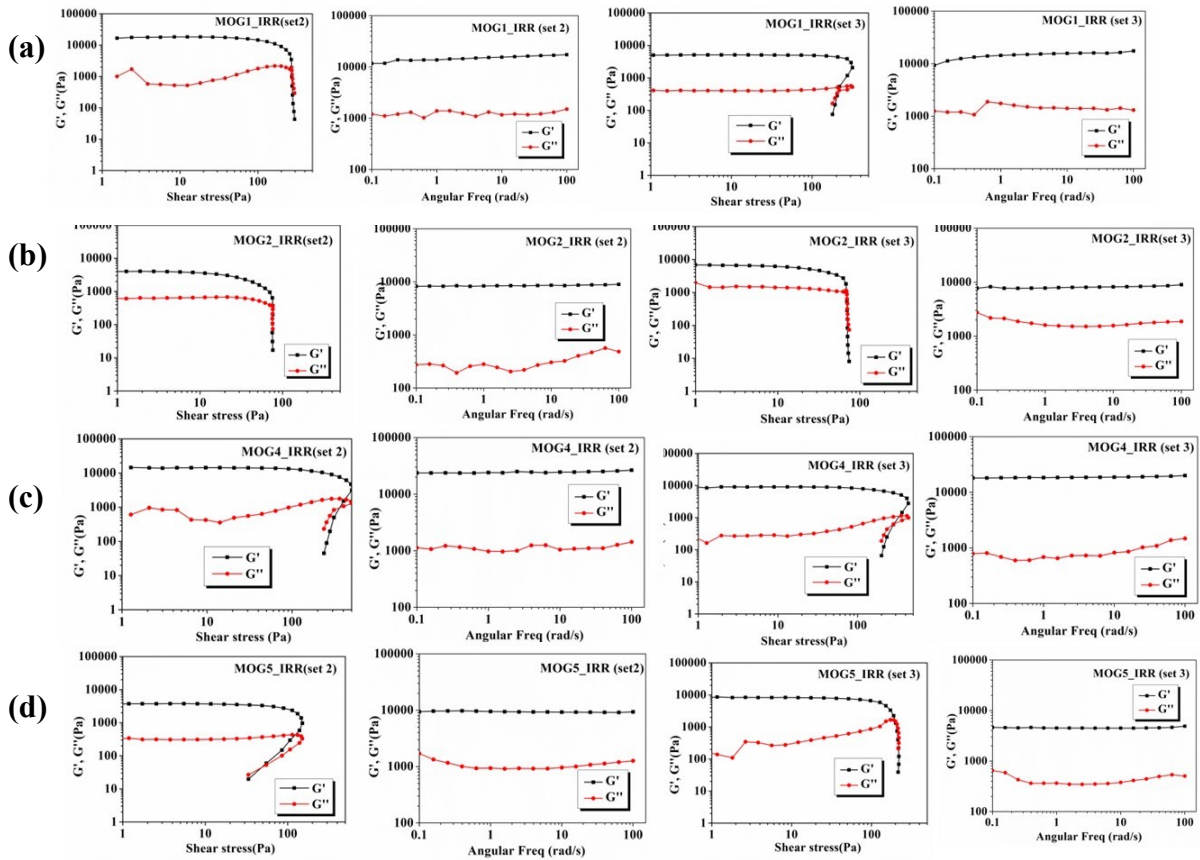

**Fig. S12** Rheological data reproducibility for **MOG1-5** after irradiation: variation of storage modulus ( $G'$ ) and loss modulus ( $G''$ ) with: shear stress and frequency for (a) **MOG1**, (b) **MOG2**, (c) **MOG3** and (d) **MOG4** (set 2 and set 3 denotes data for two different batches of sample).



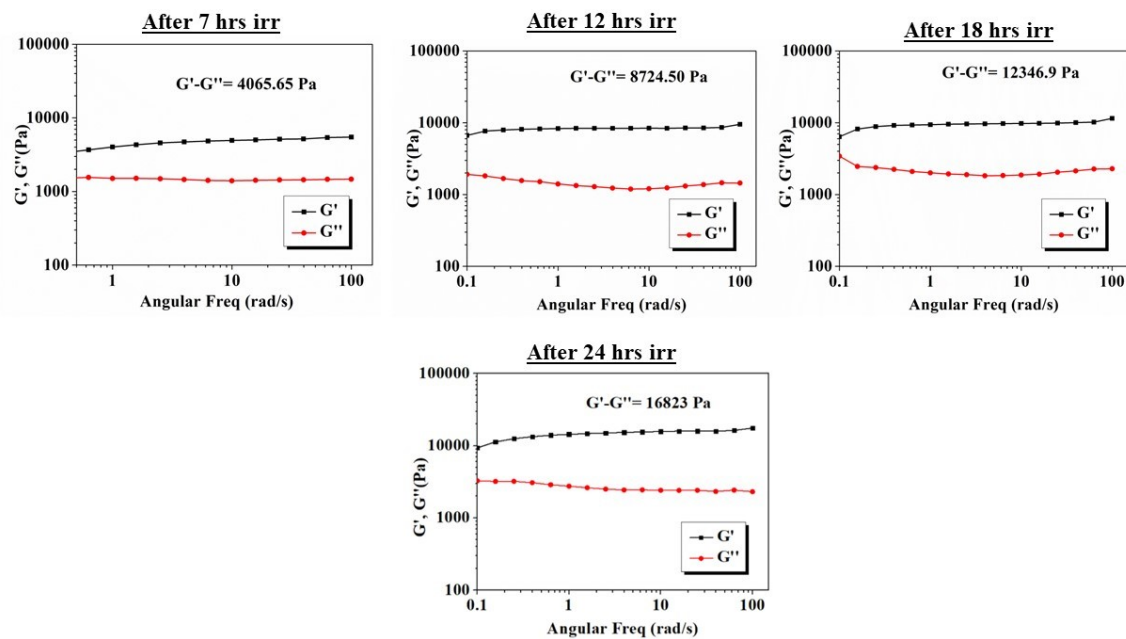

**Fig. S13** Rheological analysis for MOG1 at different course of photoreaction: variation of storage modulus ( $G'$ ) and loss modulus ( $G''$ ) with frequency showing gradual increase in mechanical strength.

### MOG5

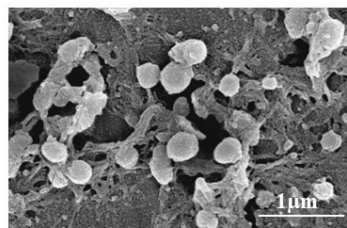

**Fig. S14** Illustration of FESEM analysis of MOG5.

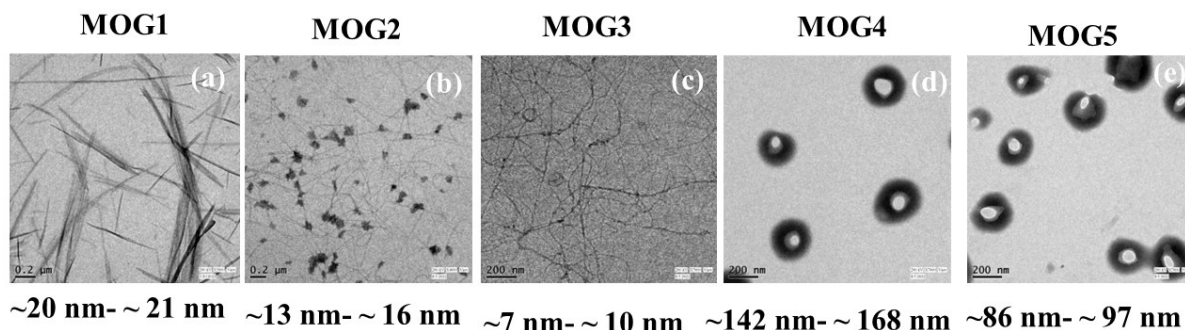

**Fig. S15 (a-e)** Illustration of TEM analysis of MOG1-5, fibril/ ring length/diameter are written at the end of the images.

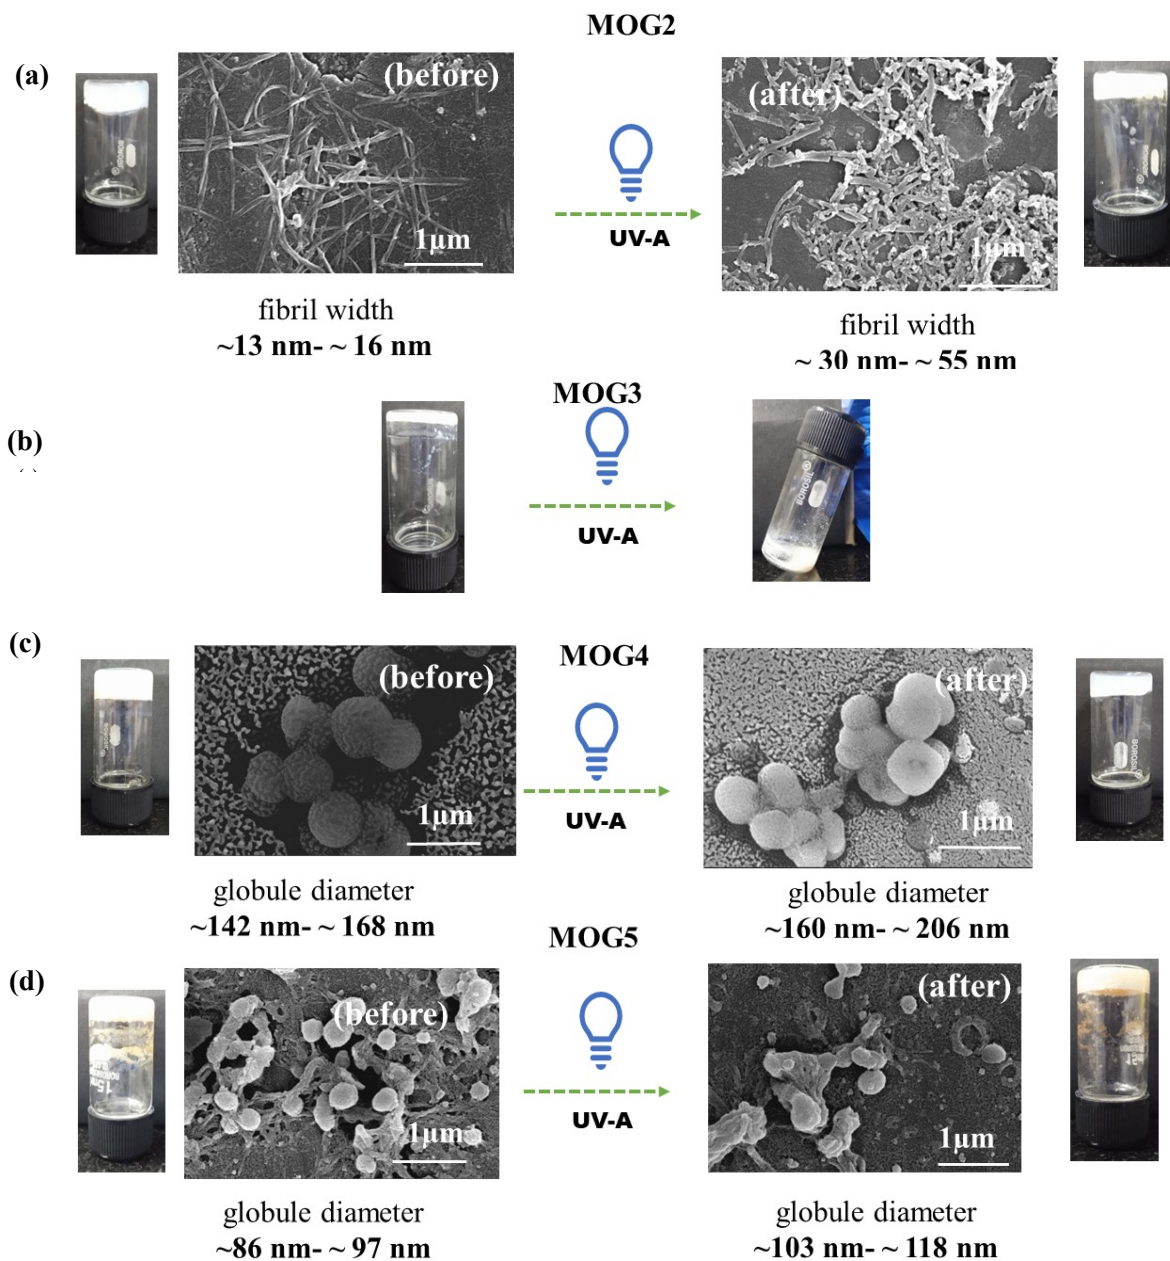

**Fig. S16** Photographs showing gels in upturned vials, and FESEM showing fibre width and spheres diameter before irradiation and after 24 hours of irradiation for (a) **MOG2**, (b) **MOG3**, (c) **MOG4** and (d) **MOG5**.

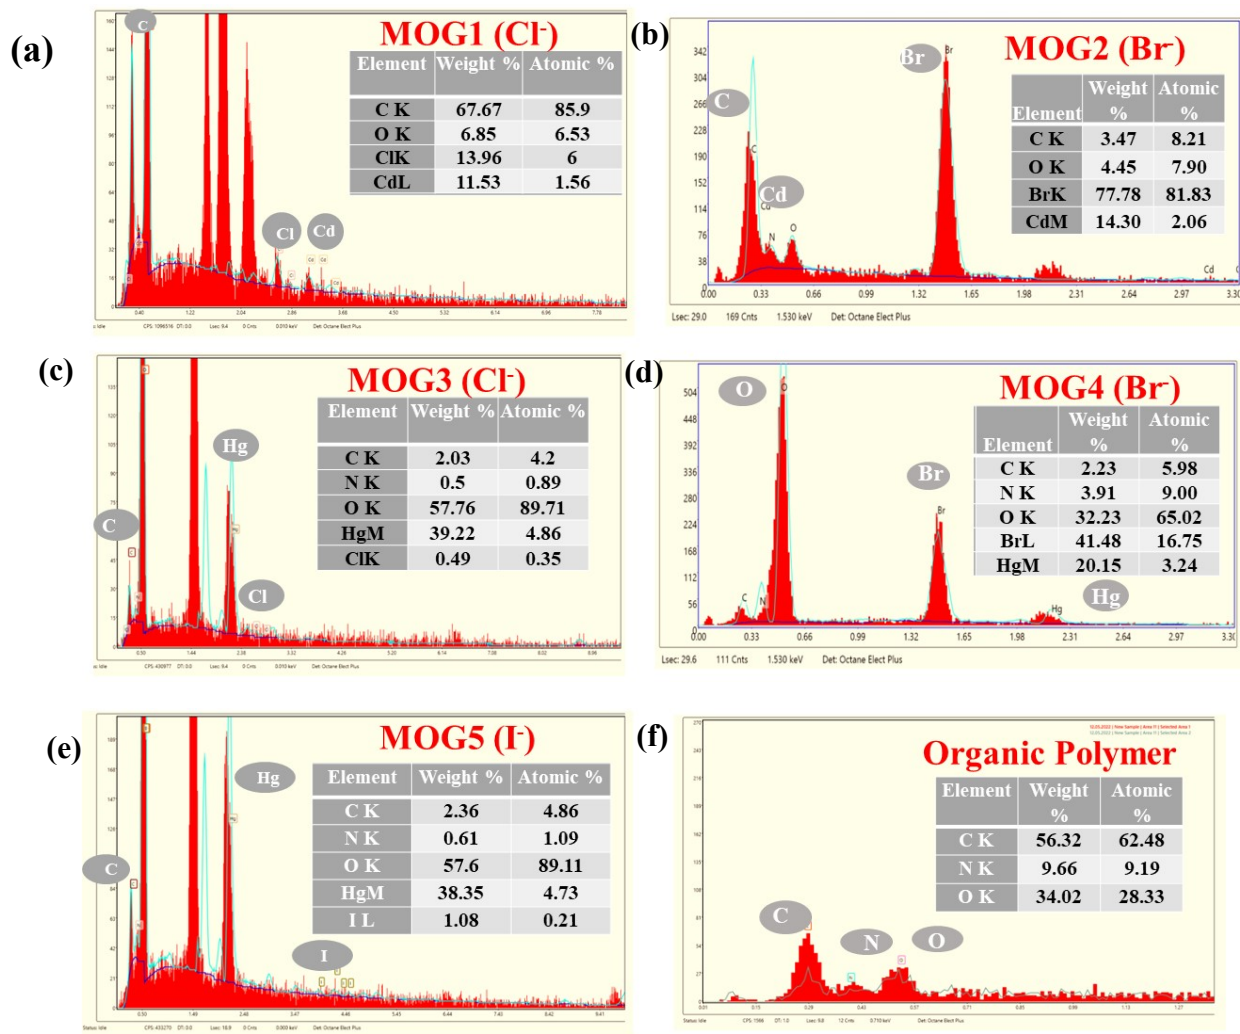

**Fig. S17** EDX- elemental analysis for: (a-e) MOG1-5, (f) organic polymer extracted from MOG1

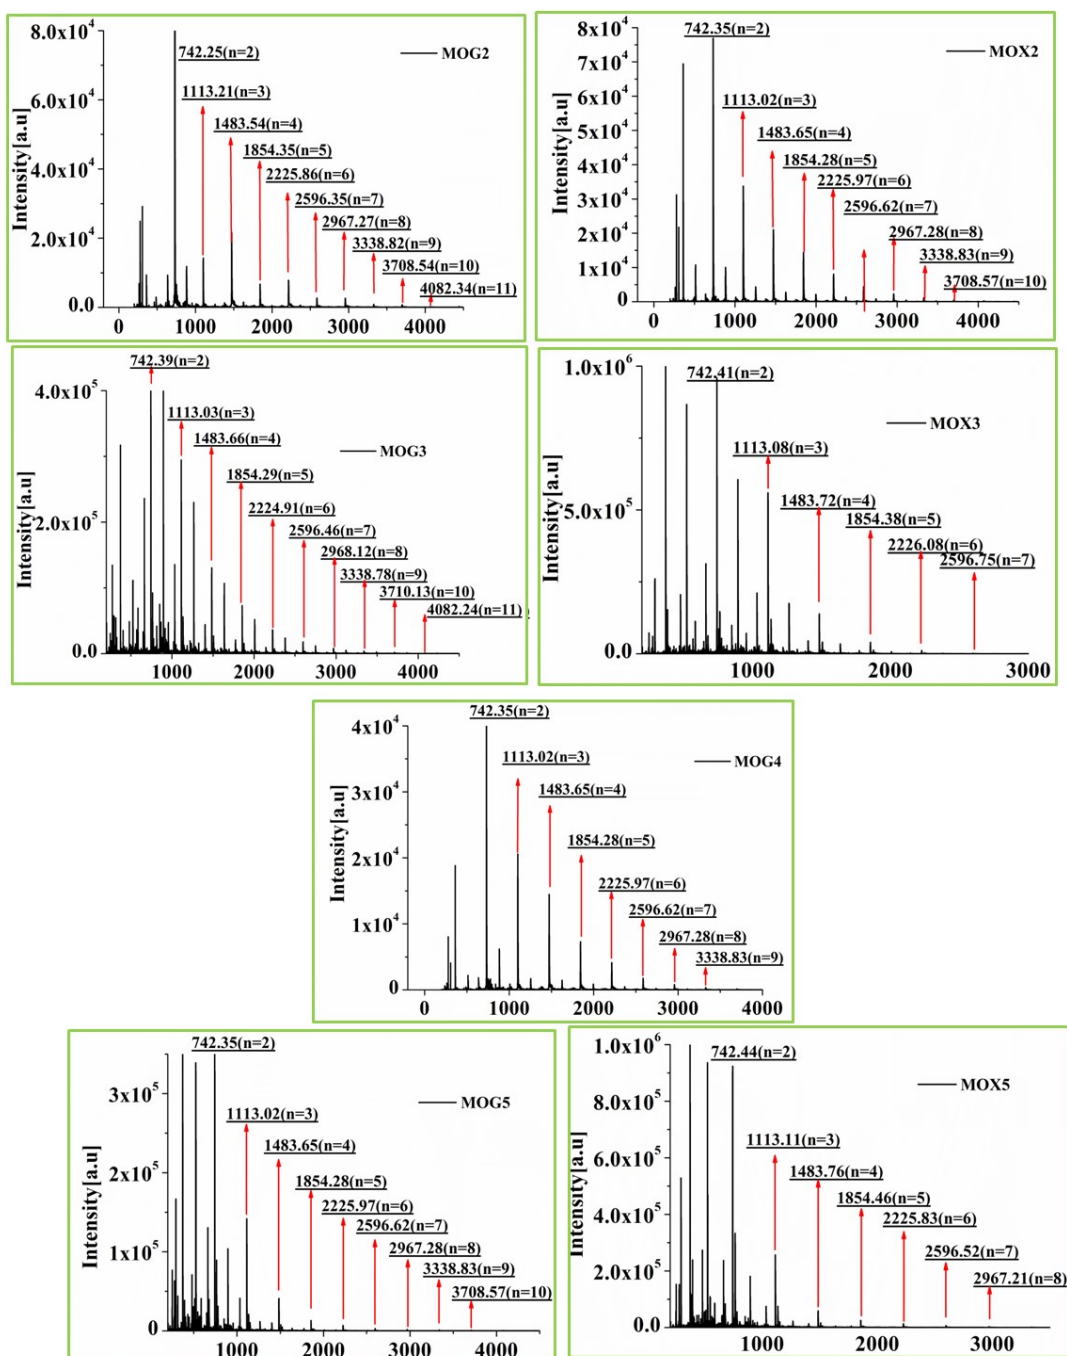

Fig. S18 MALDI-TOF analysis for MOG1-5 and xerogel of MOG1-3 and MOG5.

**Table S2** Degree of polymerization in gel and xerogel states for **MOG1-5**.

|      | No of photopolymerized gelator molecules |         |
|------|------------------------------------------|---------|
|      | Gel                                      | Xerogel |
| MOG1 | 11                                       | 10      |
| MOG2 | 11                                       | 10      |
| MOG3 | 11                                       | 7       |
| MOG4 | 10                                       | 0       |
| MOG5 | 10                                       | 8       |

**Table S3** Overall changes in rheological moduli after 24h UV irradiation for **MOG1-5**

| Gels | Yield Stress $\sigma_y$ (Pa) |        |        |        | G'-G'' (Pa) |         |           |           |
|------|------------------------------|--------|--------|--------|-------------|---------|-----------|-----------|
|      | Before                       |        | After  |        | Before      |         | After     |           |
|      | avr                          |        | avr    |        | avr         |         | avr       |           |
| MOG1 | 132.32                       |        | 228.06 |        | 4,104.14    |         | 16,823.95 |           |
|      | 140.13                       | 140.34 | 269.08 | 238.08 | 3,925.55    | 4054.82 | 16,022.03 | 16,720.24 |
|      | 148.58                       |        | 217.10 |        | 4,134.77    |         | 17,314.74 |           |
| MOG2 | 53                           |        | 69     |        | 3,896.15    |         | 7,183.92  |           |
|      | 53.90                        | 58.73  | 81.60  | 75.80  | 4,115.94    | 4091.94 | 7,126.71  | 7,406.35  |
|      | 69.30                        |        | 76.81  |        | 4,263.75    |         | 7,908.43  |           |
| MOG3 | 105.22                       |        | ...    |        | 802.7       |         | ....      |           |
|      | 87.11                        | 99.89  |        |        | 988.12      | 959.88  |           |           |
|      | 107.34                       |        |        |        | 1088.83     |         |           |           |



|             |                |               |               |               |                 |                 |                  |                  |
|-------------|----------------|---------------|---------------|---------------|-----------------|-----------------|------------------|------------------|
| <b>MOG4</b> | <b>145.25</b>  |               | <b>358.91</b> |               | <b>4,271.73</b> |                 | <b>20,285.25</b> |                  |
|             | <b>119.65</b>  | <b>136.01</b> | <b>417.35</b> | <b>370.64</b> | <b>4,150.92</b> | <b>3983.26</b>  | <b>22,281.48</b> | <b>20,900.43</b> |
|             | <b>143.15.</b> |               | <b>335.66</b> |               | <b>3,527.14</b> |                 | <b>20,134.56</b> |                  |
| <b>MOG5</b> | <b>110.80</b>  |               | <b>118</b>    |               | <b>3,915.76</b> |                 | <b>7,169.69</b>  |                  |
|             | <b>198.09</b>  | <b>154.89</b> | <b>140.43</b> | <b>127.30</b> | <b>3,860.40</b> | <b>3,996.08</b> | <b>7,701.32</b>  | <b>7,615.13</b>  |
|             | <b>155.78</b>  |               | <b>123.48</b> |               | <b>4,212.09</b> |                 | <b>7,974.39</b>  |                  |

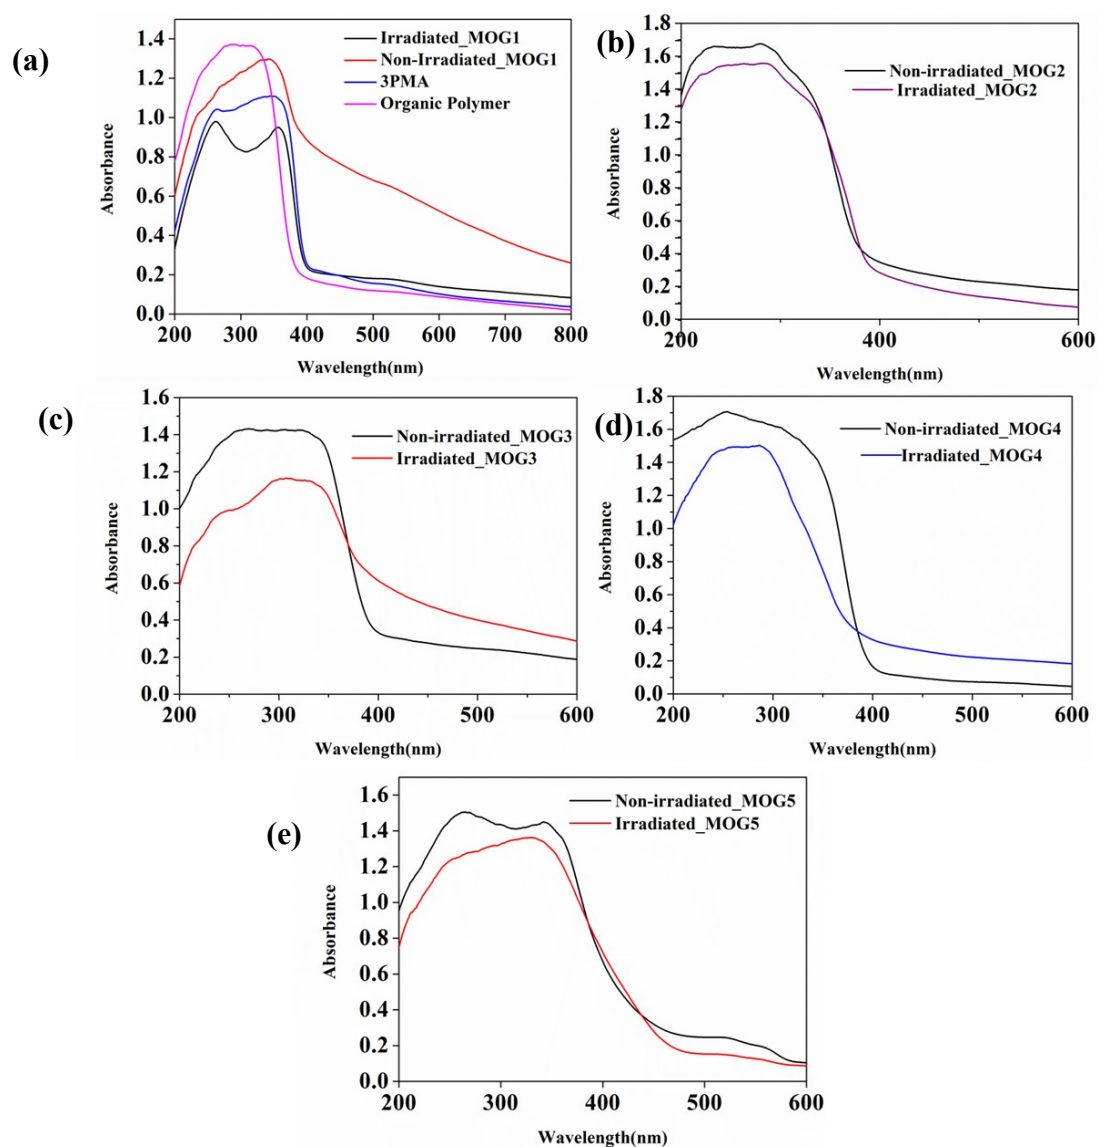

**Fig. S19** Absorption spectra in solid state of (a) 3PMA, MOG1 and irradiated MOG1; (b) MOG2 and irradiated MOG2; (c) MOG3 and irradiated MOG3; (d) MOG4 and irradiated MOG4; (e) MOG5 and irradiated MOG5.

## References:

- [1]. Mandal, R.; Biradha, K. *Dalton Trans.* **2020**, *49*, 13744-13752.
- [2]. Myshakina, N. S.; Ahmed, Z.; Asher, S. A. *J Phys Chem B.* **2008**, *112*, 11873-11877.
